# Supplementary material for: Caspase-2 is a mediator of apoptotic signaling in response to gemtuzumab ozogamicin in acute myeloid leukemia
Source: PubMed Central journal article supplement (PMC9188552; doi:10.1038/s41420-022-01071-9), 2022-06-11

## Supplemental material

Figure 1D

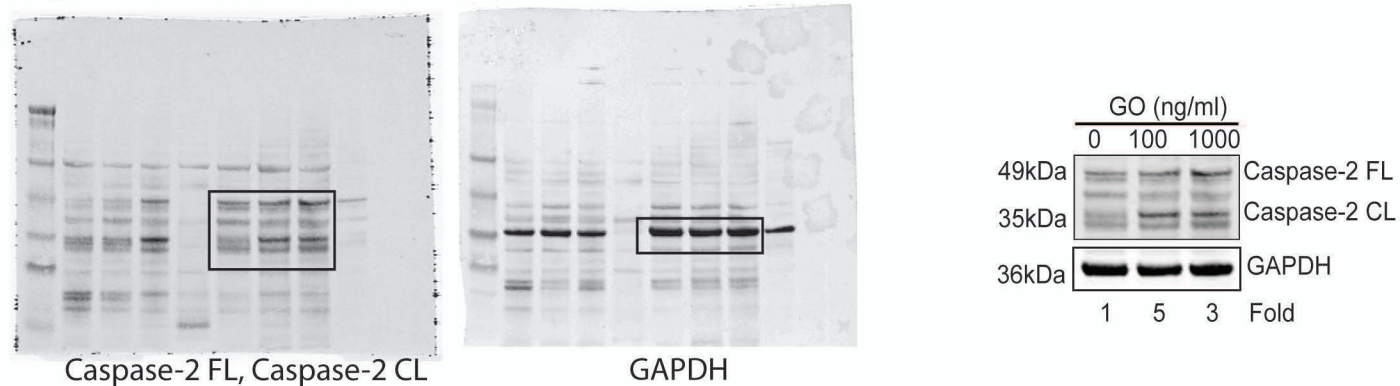

Figure 1E

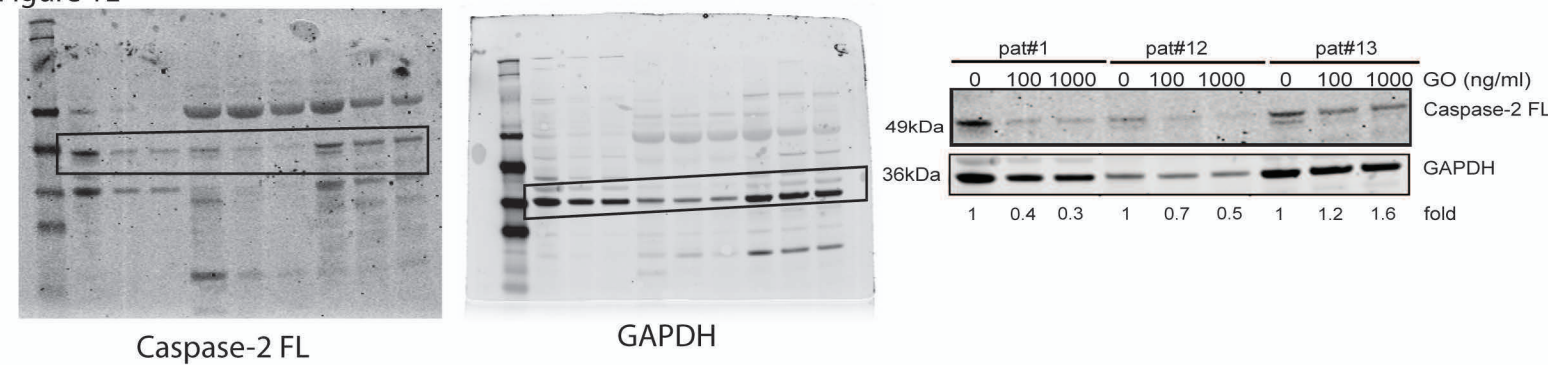

Figure 3C

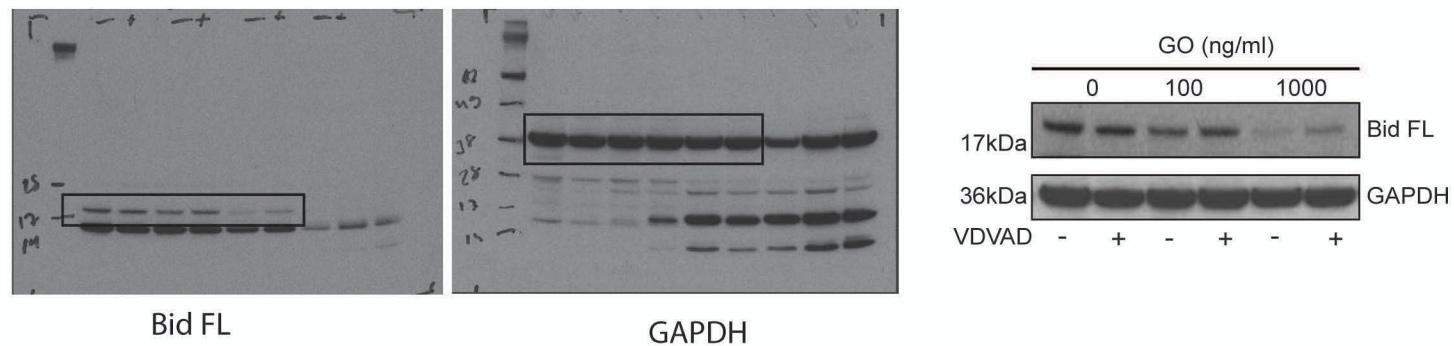

Figure 4A

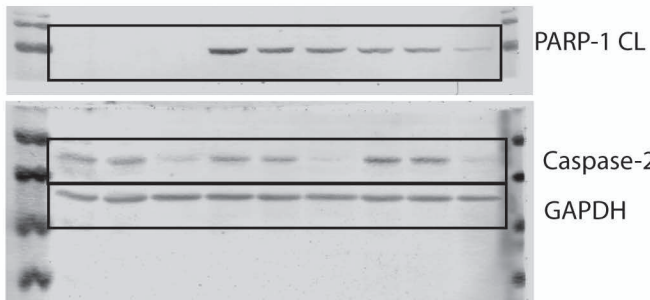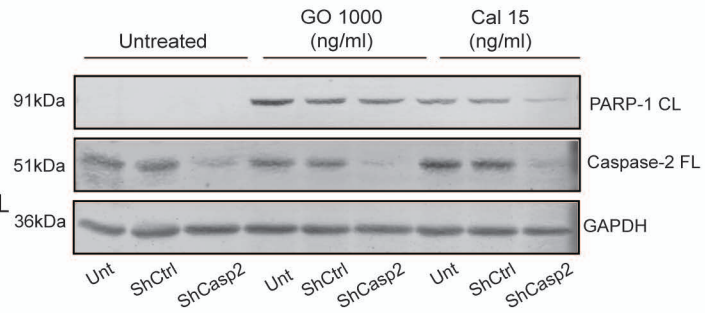

Figure 4B

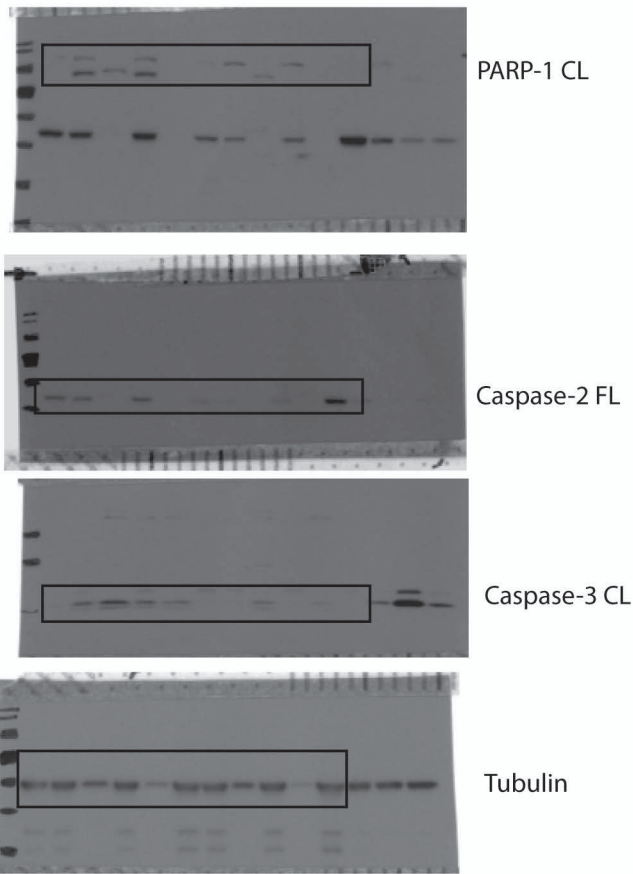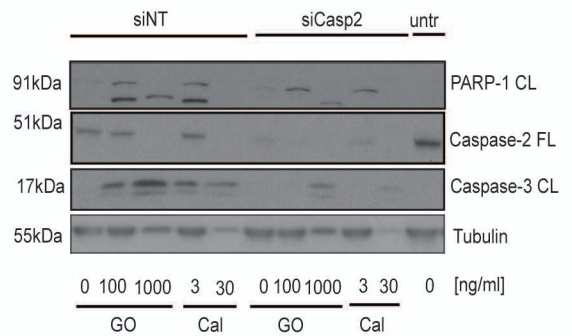

## Supplemental material

Caspase-2 FL

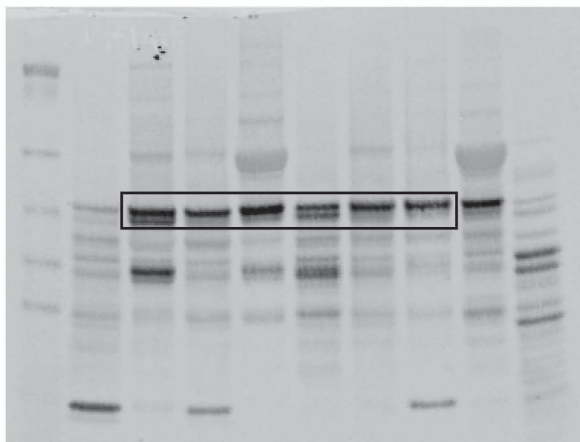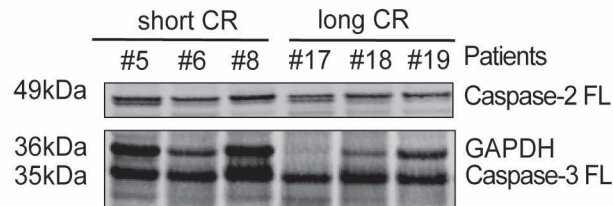

GAPDH  
Caspase-3 FL

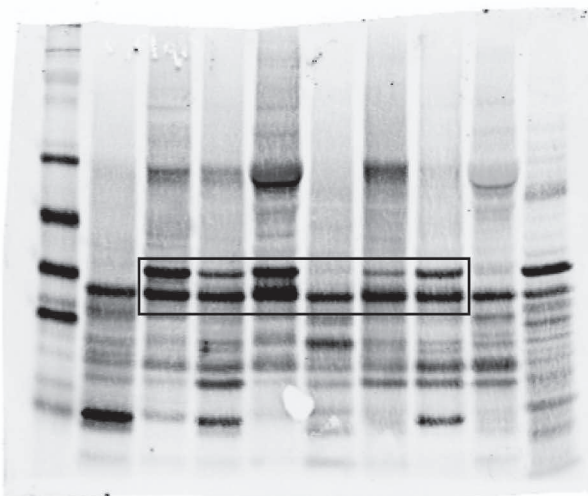

Supplement: 41420_2022_1071_MOESM1_ESM.pdf [file 41420_2022_1071_MOESM1_ESM.pdf]
